# Supplementary material for: Signal-on electrochemiluminescent biosensor for ATP based on the recombination of aptamer chip
Source: Royal Society of Chemistry journal article supplement (doi:10.1039/c1cc12080h), 2011-01-01
Supplement: c1cc12080h.pdf [file c1cc12080h.pdf]

## Supporting Information

1  
2  
3  
4  
5  
6  
7  
8  
9  
10  
11  
12  
13  
14  
15  
16  
17  
18  
19  
20  
21  
22

### Experimental details

#### Reagents

Aldehyde-functionalized Ru-SiNPs were prepared according to the procedure reported in S1 (Santra et al., 2001). The TEM (Transmission electron microscopy) image of nanoparticles (Fig.S1, Tecnai G2 F20 S-TWIN 200KV) showed that the prepared aldehyde-functionalized Ru-SiNPs solution was similar to that of the published assay (S1, Santra et al., 2001). ATP and its analogue compounds, cytidine triphosphate (CTP), guanosine triphosphate (GTP), uridine triphosphate (UTP), and 2-(Dibutyl-amino) ethanol (DBAE), were purchased from Sigma (St. Louis, MO) and used without further purifying. Other chemicals were of analytical reagent grade. Double-distilled water was used throughout. Phosphate buffer solution (PBS, pH 7.4) was used as the DNA buffer solution.

The DNA oligonucleotides were synthesized by Sangon Inc. (Shanghai, China).

And their sequences were shown as follows:

Capture probe ( ss-DNA1)

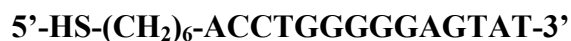

Detection probe (ss-DNA2)

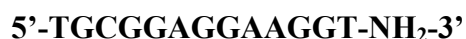

A single ATP aptamer was synthesized, and its sequence is characterized as the combination of the former two fragments.

## 23 **Apparatus**

24 The measurement of ECL was performed using a BPCL ultra-weak luminescence  
25 analyzer (Institute of Biophysics, Chinese Academy of Science, Beijing, China) and a  
26 CHI 660a electrochemical system (Shanghai Chenhua Equipments, China). Gold  
27 electrodes (diameter: 3.0 mm, surface area: 7.07 mm<sup>2</sup>, CH Instruments, Shanghai,  
28 China) were used as the working electrodes. Platinum wire and Ag/AgCl (saturated  
29 with KCl) were used as counter and reference electrodes, respectively. The  
30 electrochemical cell was placed directly in front of a photomultiplier (PMT, operated  
31 at -800 V).

## 32 **Preparation of the sensor and detection procedures**

33 The ECL probe was fabricated by adding freshly prepared aldehyde-  
34 functionalized Ru-SiNPs into the buffer solution containing ss-DNA2 with amido in  
35 the 3' end to interact with each other in 37°C water bath for 2 h. Then, the above  
36 Ru-SiNPs-modified-ssDNA2 was washed, centrifuged and suspended in PBS and  
37 kept at 4 °C for later use.

38 A lot of literatures reported the procedure for sensor fabrication (eg., S2, Zhu et al,  
39 2010; S3, Chen et al, 2010). In brief, the gold electrode was polished with 1.0, 0.3 and  
40 0.05 μm α-Al<sub>2</sub>O<sub>3</sub> powders in sequence before each experiment; then, it was rinsed  
41 with double-distilled water and ultrasonically cleaned in ethanol and water for a short  
42 time. Finally, the electrode was electrochemically activated in 0.5 mol/L H<sub>2</sub>SO<sub>4</sub>.

43 A 10 μL ssDNA1 solution was dropped onto the previously activated gold  
44 electrode surface and kept it for 2 h to form an Au-thiol monolayer. Then the

45 modified electrode was immersed in MCH solution for 1 h to cover the nonspecific  
46 sites. Eventually, the electrode was immersed into the solution which contains  
47 Ru-SiNPs-modified-ssDNA2 and various concentrations of ATP at room temperature  
48 and held for for 2 h. After these procedures, the electrode was washed with buffer  
49 solution to remove the excrescent matter. The obtained biosensor is immersed in 2.0  
50 mL PBS ( Phosphate Buffered Solution, pH 7.4) containing  $5.0 \times 10^{-3}$  mol/L DBAE  
51 for ECL detection..

### 52 **Characterization of the sensor**

53 Faradic electrochemical impedance spectroscopy (EIS) was employed to monitor  
54 the process of the electrode modification. The spectra consists of a semicircle part at  
55 higher frequency and a linear one at lower frequency, referring to the electron  
56 transfer-limited and diffusion process which can directly described by Nyquist plots.  
57 The increase of the diameter of the semicircle indicates an increase of the interfacial  
58 charge-transfer resistance ( $R_{ct}$ ). The electrolyte solution with electroactive ions  
59  $Fe(CN)_6^{3-/4-}$  and with 0.5 mol/L KCL was used. Some substances with negative charge  
60 can prevent redox probe  $Fe(CN)_6^{3-/4-}$  from transferring on the electrode surface.

61 As shown in Fig.S2, the  $R_{ct}$  value for the bare gold electrode (curve *a*) is about  
62  $100\Omega$ , indicating the electroactive ions of  $Fe(CN)_6^{3-/4-}$  transfer well on the electrode  
63 interface. Since its surface is immobilized by thiol-modified ssDNA1, the value of  
64 impedance (curve *b*) increases owing to the negatively charged phosphate backbone  
65 of the oligonucleotides, which increases the electron-transfer distance (S4, Huang et al,  
66 2010). The ssDNA1 modified electrode was immobilized into the solutions of

67 ssDNA2 with or without ATP for about 2 h. In the case of ssDNA2 solution with ATP,  
68 little amount of ssDNA2 could interact with ssDNA1 through physical adsorption  
69 and only partial ssDNA2 is captured on the electrode surface, which results in larger  
70  $R_{ct}$  of curve *c*. Compared with the former one, a larger value (curve *d*) was observed  
71 attributing to the stable complex formed by the ATP-induced split aptamer chips  
72 combination. This would produce a nearly insulating layer on the electrode surface,  
73 and deter the electro-active species in the solution from transferring to the electrode  
74 surface.

#### 75 **Serum samples detection procedure**

76 Human serum samples were provided by the Hospital of Fuzhou University  
77 (Fujian, China). Prior to each test, the samples were treated with EDTA for holding  
78 back the blood clotting. Then, the solutions were centrifuged to gather total blood  
79 cells. The obtained samples were diluted  $10^3$  times with PBS. Subsequently, cell lysis  
80 was performed under iterative freezing (at  $-77^{\circ}\text{C}$ ) and melt (at  $37^{\circ}\text{C}$ ) according to the  
81 literature (S5, Zuo et al, 2007). Then Ru-SiNPs-modified-ssDNA2 was added into the  
82 sample solution. The ssDNA1 modified electrode was immersed into the mix solution  
83 for 2 h. After these procedures, the electrodes were washed with buffer solution to  
84 remove the excrement matter, and the ECL intensity from the sensor was tested. The  
85 ATP was added into the serum samples for testing the biosensor.

86

#### 87 **Reference**

88 S1. S. Santra, P. Zhang, K. M. Wang, R. Tapeç, W. Tan, Anal. Chem. 2001, 73,  
89 4988.

90 S2. X. Zhu, Z. Y. Lin, L. F. Chen, B. Qiu, G. N.Chen, Chem. Commun. 2010, 46,  
91 3149-3151.

92 S3. L. F. Chen, Q. H. Cai, F. Luo, X. Chen, X. Zhu, B. Qiu, Z. Y. Lin, G.. N. Chen,  
93 Chem. Commun. 2010, 46,7751-7753

94 S4. H. P. Huang, Y. L. Tan, J. J. Shi, G. X. Lian, J. J. Zhu, Nanoscale 2010, 2, 606.

95 S5. X. L. Zuo, Y. Xiao, K. W. Plaxco, J. Am. Chem. Soc. 2009, 131, 6944.

96

97

98

99

100

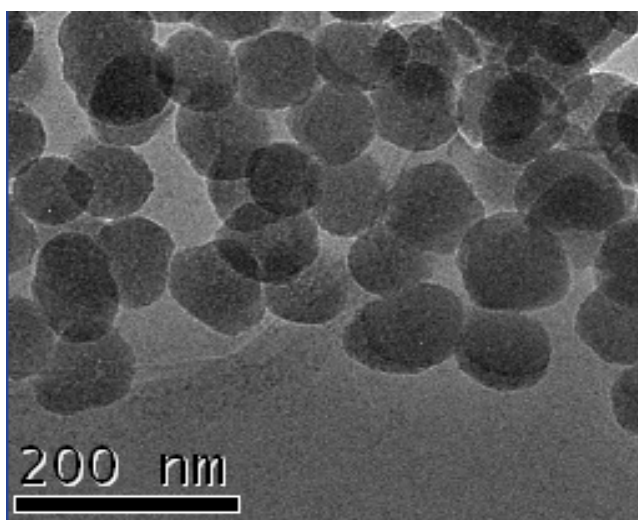

101

102

**Fig.S1** The TEM image of Ru-SiNPs

103

104

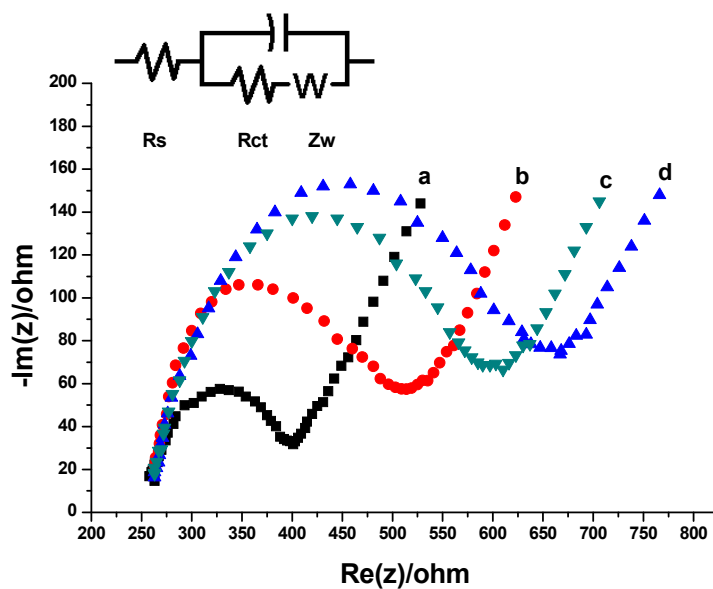

105

106 **Fig. S2** Faradic electrochemical impedance spectroscopy of different modified electrodes

107 in 5.0 mmol/L  $[Fe(CN)_6]^{3-/4-}$  containing 0.5 mol/L KCL (a) bare Au electrode (b)

108 ssDNA1 modified electrode (c) dsDNA electrode (d) dsDNA-ATP electrode. The data

109 were received based on the biasing potential 0.218V and 5 mV alternative voltages in the

110 frequency range of 1 Hz-10 kHz.

111

112

113

114

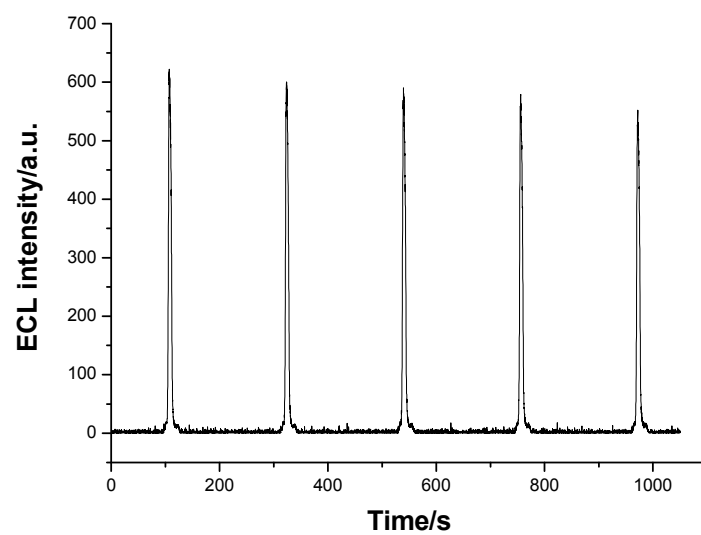

115

116

117 **Fig. S3** Stability of the aptamer-sensor after reacting with  $1.0 \times 10^{-11}$  mol/L ATP.

118
